# Supplementary material
Source: PubMed Central journal article supplement (PMC4654055)
Supplement: supp_ddv402_ddv402supp_figs.pdf [file supp_ddv402_ddv402supp_figs.pdf]

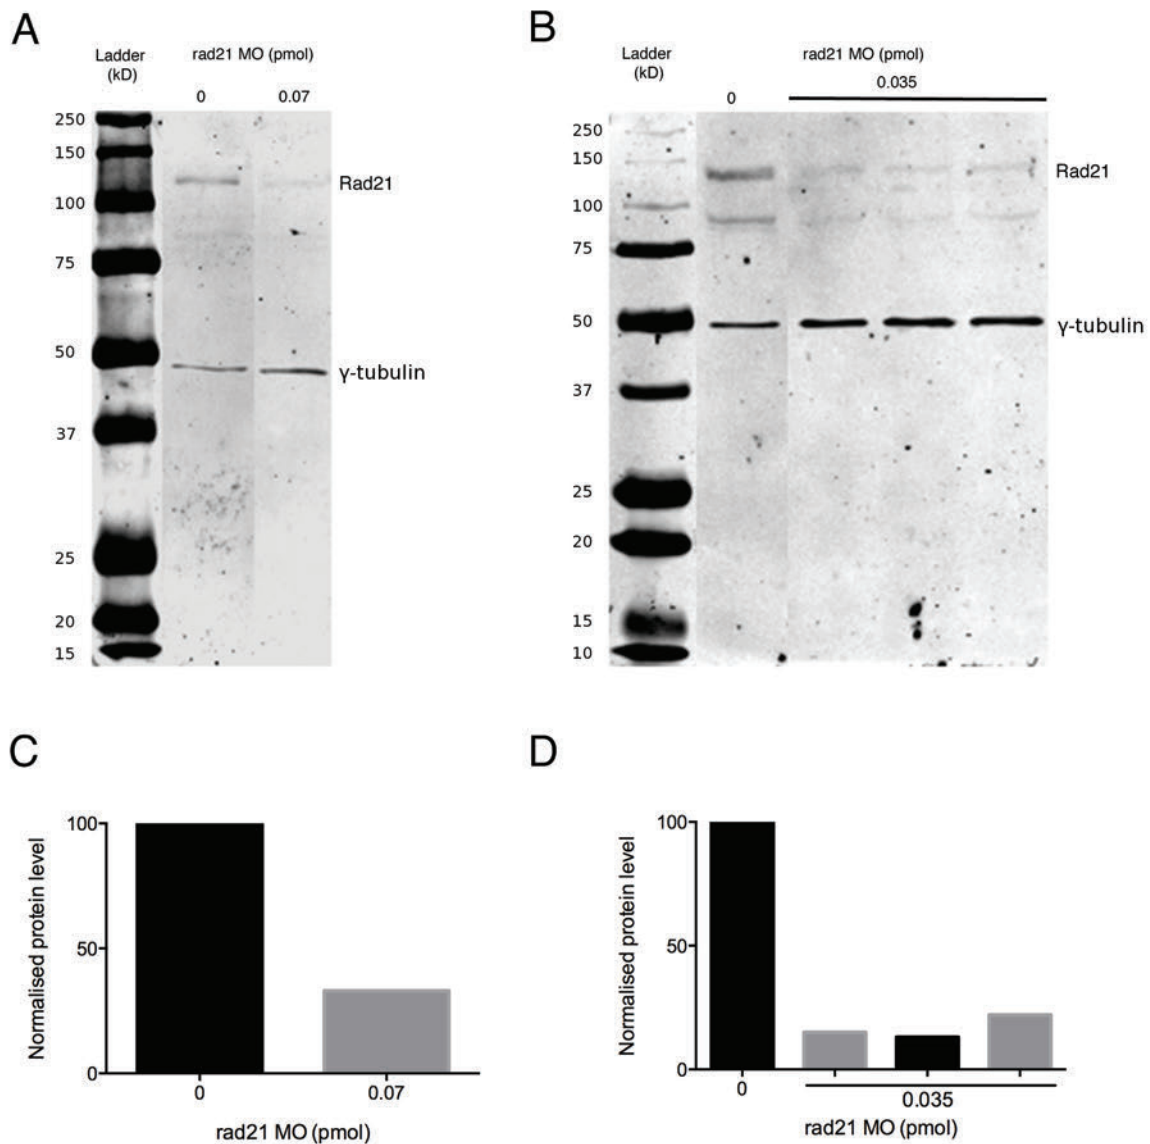

**Figure S1.** Low doses of Rad21 morpholino (MO) decrease but do not entirely abolish Rad21 protein. Rad21 protein quantity was analysed by Western blot in mock-injected and Rad21 MO-injected embryos from two independent experiments. Protein was extracted from 12-somite stage embryo lysates. (A) Western blot of Rad21 protein level in embryos injected with 0 and 0.07 pmol Rad21 morpholino. (B) Western blot of Rad21 protein level in embryos injected with 0 and 0.035 pmol Rad21 MO (biological triplicates were loaded). In (A) and (B),  $\gamma$ -tubulin protein was detected as a loading control. (C-D) Graphs show quantification of Rad21 protein level in the blots above, normalized to the 0 pmol controls. Rad21 protein levels were reduced 70-80% following morpholino injection.

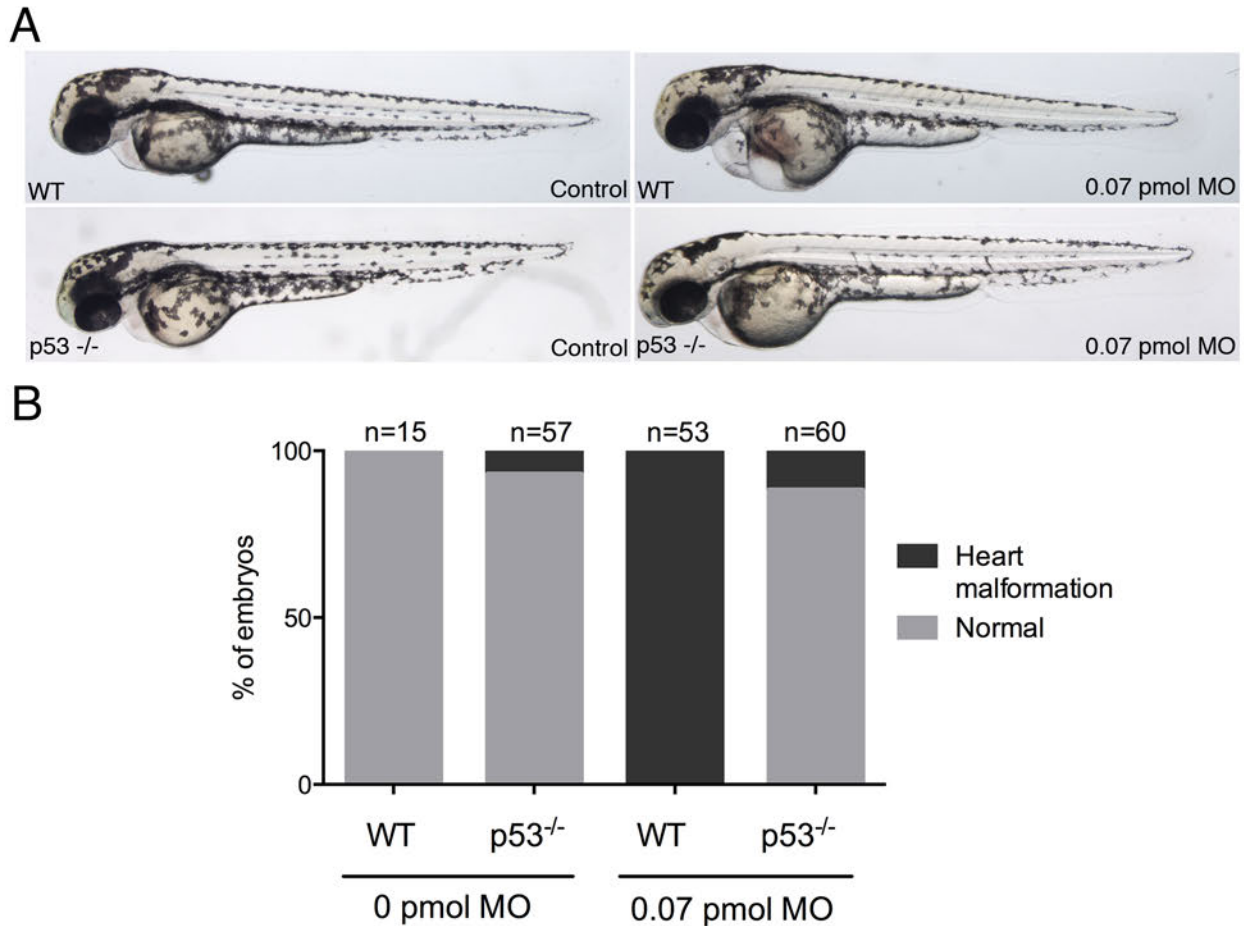

**Figure S2.** p53 deficiency rescues heart malformations caused by Rad21 depletion. Wild-type (WT) and p53 homozygous mutant (p53<sup>zdf1</sup>) embryos were injected with 1 nl 0.07 pmol Rad21 ATG MO, or 1 nl phenol red dye solution (0 pmol controls) at the 1-cell stage. (A) Embryos were examined at 2 days post fertilization (2 dpf). Embryos shown are representative examples of 2 dpf phenotypes, lateral views with anterior to the left. (B) Rad21 MO caused heart malformations in 53/53 of WT embryos, while 53/60 p53<sup>zdf1</sup> homozygous embryos had normal hearts following injection with Rad21 MO. Graph shows percentage of embryos with each phenotype at 2 dpf. Total number of embryos per group is shown above bars.

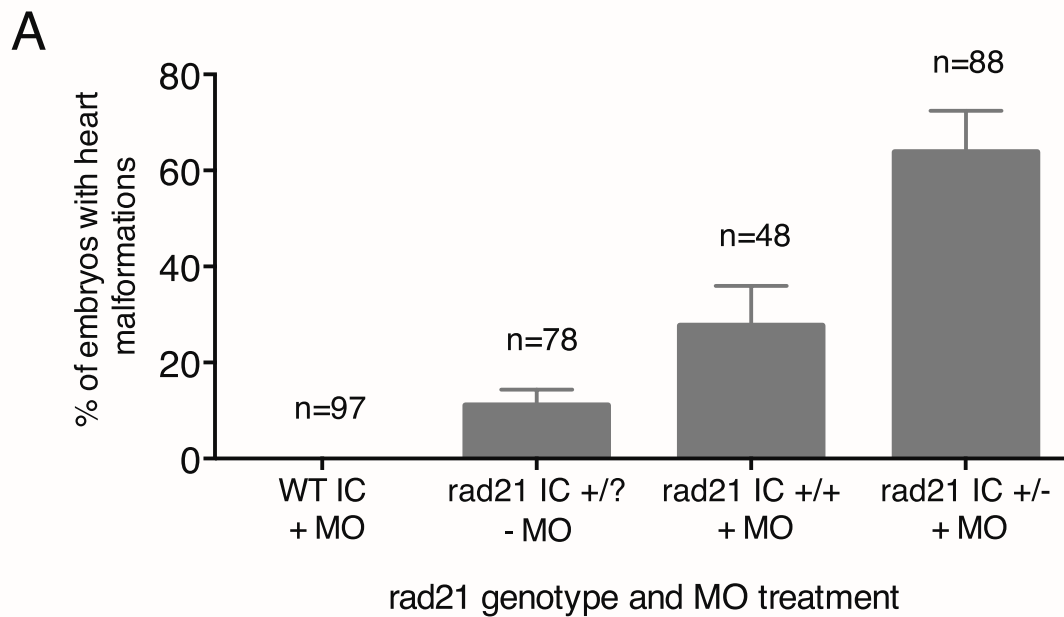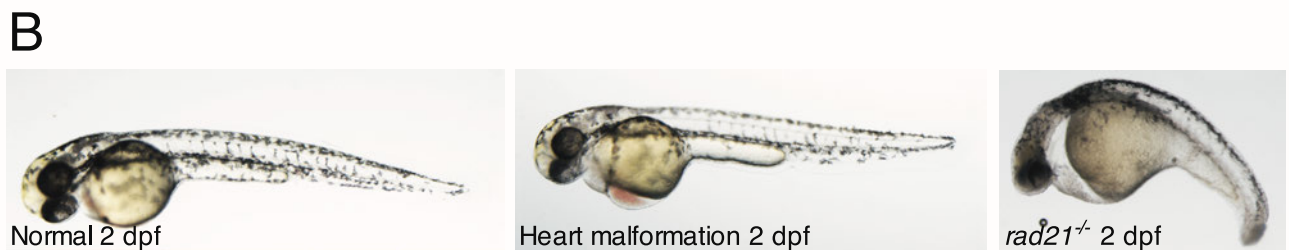

**Figure S3.** The Rad21 morpholino (MO) causes heart defects specifically through the *rad21* genetic pathway. Embryos from wild-type incrosses (WT IC) and *rad21*<sup>nz171/+</sup> incrosses (*rad21* IC) were injected with 0.02 pmol Rad21 MO (+ MO). At this dose, we never observed heart defects in embryos from a WT IC background, indicating that this dose of morpholino has no effect on a wild type background. However, the same dose caused heart defects in embryos from a *rad21*<sup>nz171/+</sup> IC background, indicating that the MO interacts specifically with the *rad21* genetic pathway. (A) Graph showing percentage of embryos with heart malformations in each treatment group. +/- refers to *rad21*<sup>nz171/+</sup> IC embryos in which it is unknown if the genotype is wild type (+/+) or heterozygous (+/-). Data are means of 3 independent biological replicates. Total numbers of embryos per group are displayed above the bars. Error bars are  $\pm$  SEM. The level of Rad21 was significantly associated with frequency of heart defects,  $\chi^2$  (3, N=311), 109.4,  $p < 0.0001$ ). (B) Example images showing how embryos were classified based on phenotype at 2 days post-fertilisation (dpf). Views are lateral with anterior to the left. *rad21* null mutants were excluded from this assay, and were identified on the basis of the characteristic phenotype shown (far right).

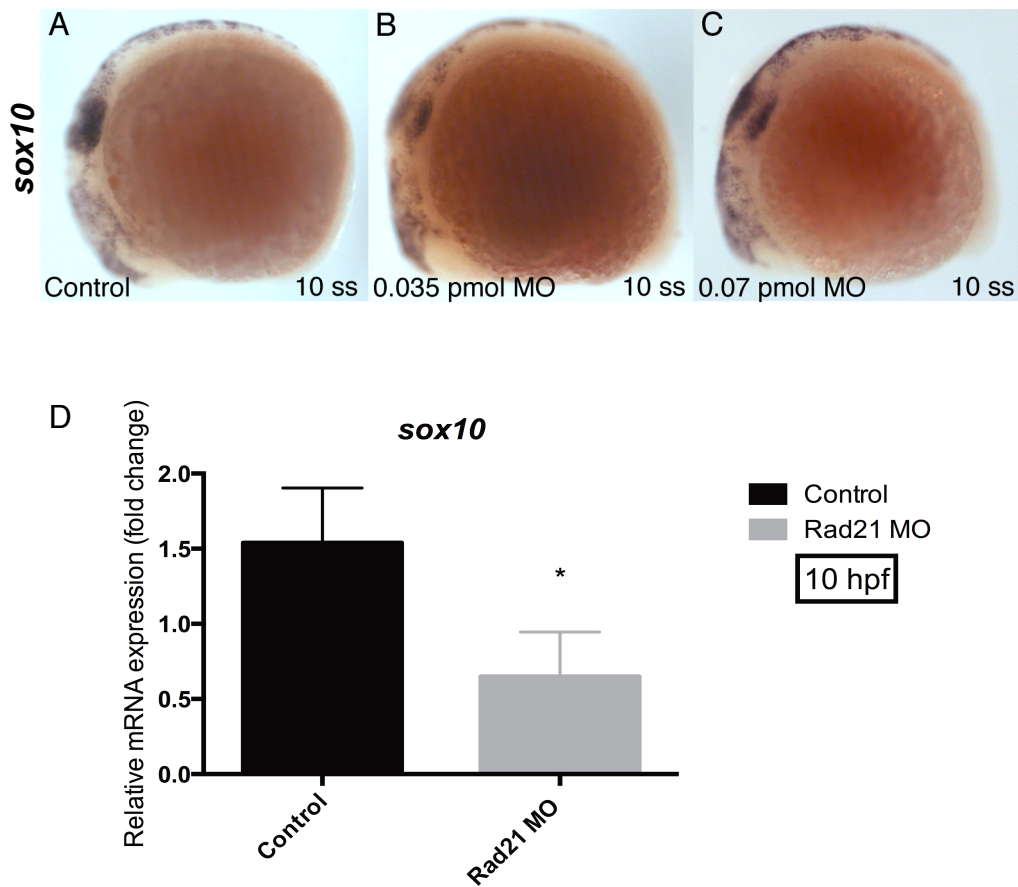

**Figure S4.** Minor Rad21 depletion does not prevent neural crest cell specification or early migration as judged by spatial *sox10* expression, but modest depletion does reduce the quantity of *sox10* mRNA. Zebrafish embryos were injected at the 1-cell stage with 1 nl phenol red dye (controls), or with 0.035 pmol or 0.07 pmol Rad21 ATG MO. The expression pattern of the neural crest (NC) marker gene *sox10* was examined by in situ hybridisation at the 10-somite stage (10 ss). Images were taken of whole mount embryos, lateral view with anterior to the left. (A) Control embryo. In controls, *sox10* expression marks NC cells at their site of specification along the neural tube, as well as early migration of NC cells to the anterior (n=24). (B-C) Rad21-depleted embryos. In embryos depleted of Rad21 using either 0.035 pmol (B) or 0.07 pmol (C) morpholino, the *sox10* expression pattern was no different to controls (0.035 pmol, MO n =18, 0.07 pmol, MO n = 9). (D) Quantitative RT-PCR analysis of *sox10* mRNA expression in 10 hpf embryos, comparing control and Rad21 MO-injected embryos (0.5 pmol MO). The Y axis indicates relative mRNA levels, normalised to *rpl13a* and *actb* mRNA. Data were generated from the same samples used for RNA-seq (Table S1), and represent the mean of three independent biological replicates. Error bars are standard error of the mean. Asterisk indicates a significant change in *sox10* expression ( $p < 0.05$ ).

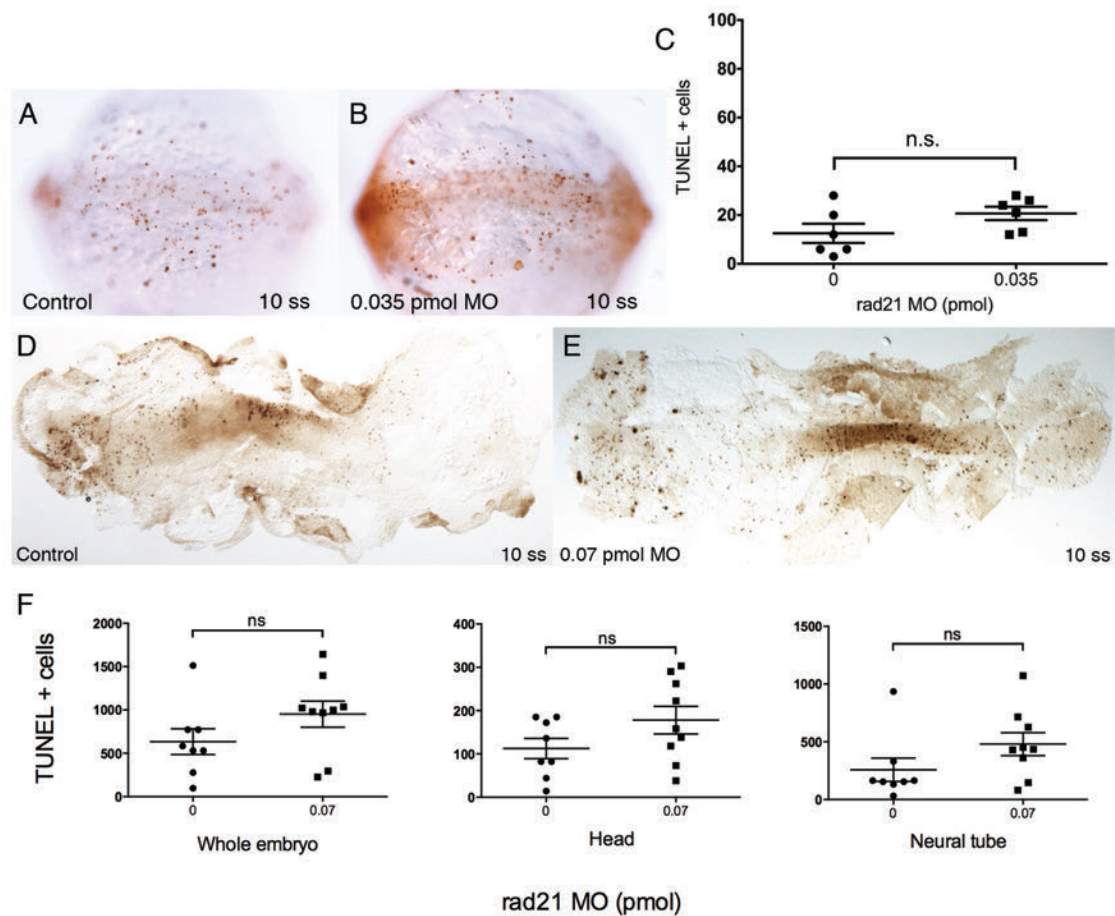

**Figure S5.** Rad21 depletion caused a slight, non-significant increase in cell death. Zebrafish embryos were injected at the 1-cell stage with 1 nl phenol red dye (controls), or with 0.035 or 0.07 pmol Rad21 ATG MO as indicated. Apoptosis was examined by TUNEL staining once injected embryos had reached the 10-somite stage. (A, B) Representative images of control (n=6) and Rad21-depleted (n=6) whole-mount, TUNEL-stained embryos, dorsal views, anterior to the left. (C) Graphs show the mean number of TUNEL-stained cells along the axis of whole-mount 0.035 pmol MO-injected and control embryos. (D, E) Representative images of control (n=8) and Rad21-depleted (n=9) embryos. Images are of flat mounted embryos, dorsal view, anterior to the left. (F) Graphs show the mean number of TUNEL-stained cells in whole embryos (left) and the neural crest cell-containing head (centre) and neural tube (right) regions. Each data point represents an individual embryo. Apoptosis was not significantly increased by Rad21-depletion ( $p > 0.05$ , unpaired  $t$ -test). Error bars are  $\pm$ SEM. The 0.07 pmol Rad21 MO dose elicited a trend toward increased apoptosis.
